# Supplementary material for: Lactosylceramide promotes hypertrophy through ROS generation and activation of ERK1/2 in cardiomyocytes
Source: PubMed Central journal article supplement — Glycobiology. 2014 Mar 21;24(6):518–31. doi: 10.1093/glycob/cwu020 (PMC4001711; doi:10.1093/glycob/cwu020), 2014-03-21
Supplement: supp_cwu020_cwu020supp.pdf [file supp_cwu020_cwu020supp.pdf]

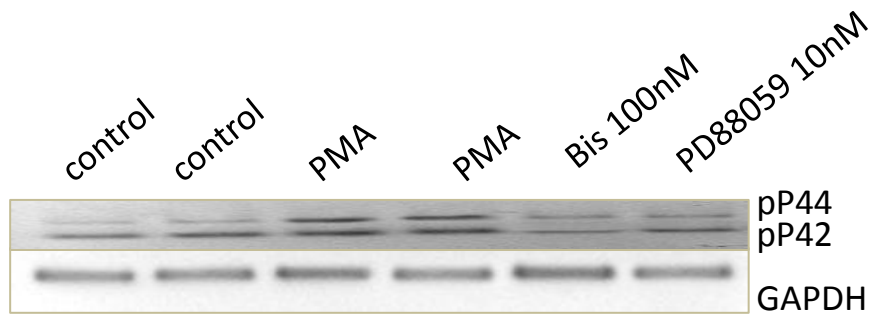

*Supplementary Figure 1:*

*Effectiveness of the inhibitors used in the study:* Cells were treated with Phorbol-12-Myristate-13-Acetate (PMA) (0.1  $\mu\text{mol/L}$ ), an activator of PKC, in the presence or absence of Bis (100nM) and PD98059 (10nM). Western blot of cell extracts were probed for activated p44/42 MAPKinase. PMA mediated MAP Kinase activation was abolished by PKC inhibitor (Bis) and P44 MAP kinase inhibitor PD98059
